# Supplementary material for: Genome-wide CRISPR/Cas9 screens reveal shared and cell-specific mechanisms of resistance to SHP2 inhibition
Source: PubMed Central journal article supplement — J Exp Med. 2023 Feb 23;220(5):e20221563. doi: 10.1084/jem.20221563 (PMC9998968; doi:10.1084/jem.20221563), 2023-02-23

Cropped and Processed

Uncropped and Unprocessed

2B: MOLM13

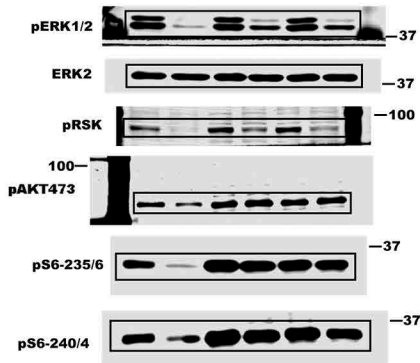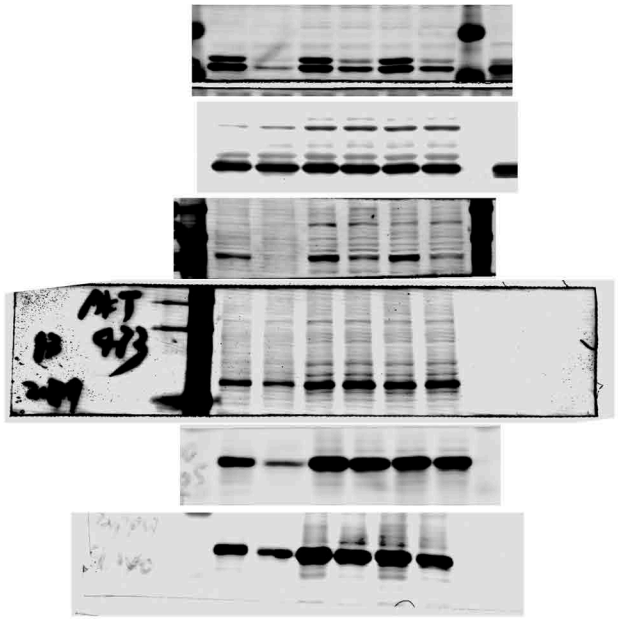

2C: MOLM14

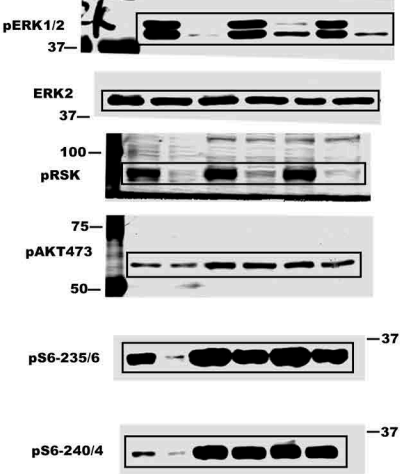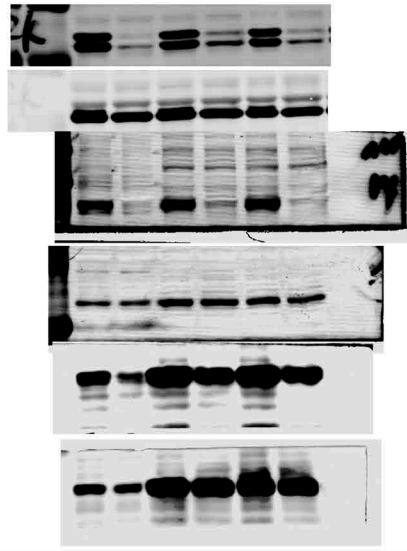

2C: MV4-11

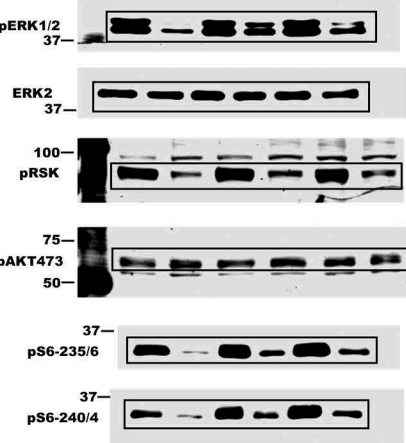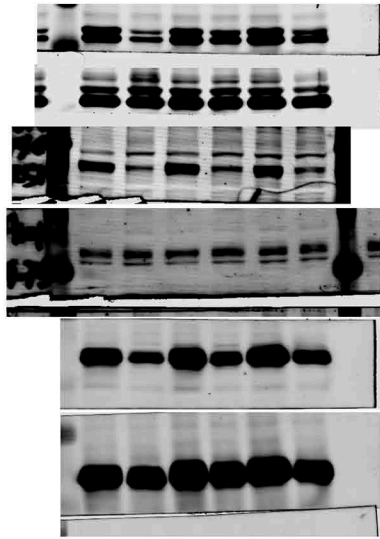

2D: Lower Panel MOLM13

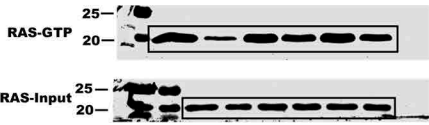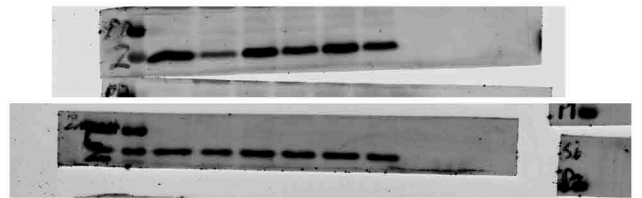

2I: MOLM13

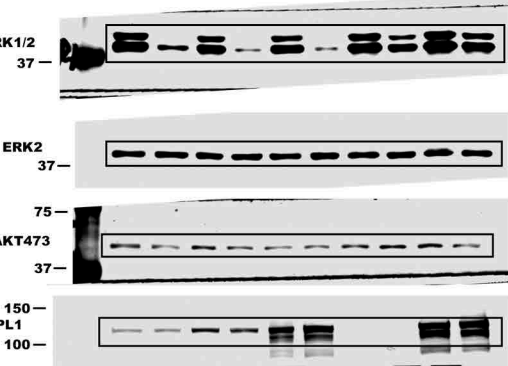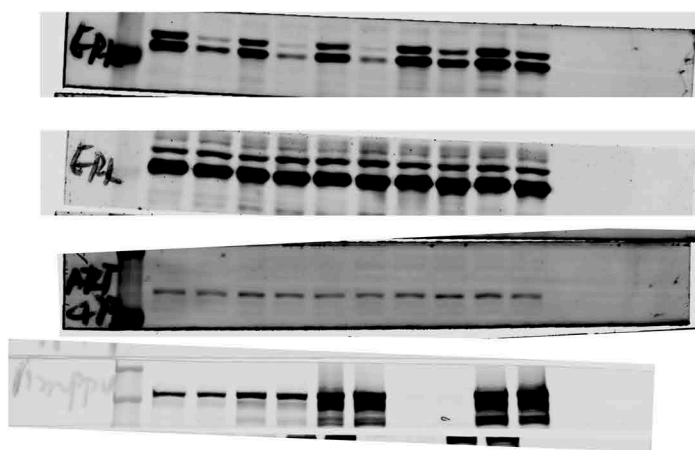

2J: MOLM13

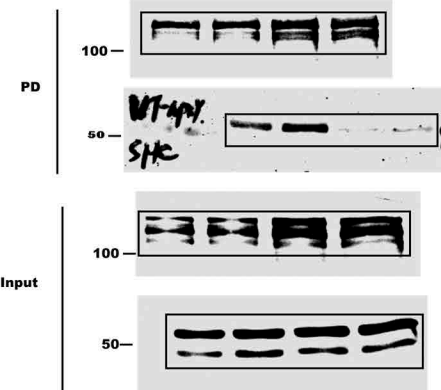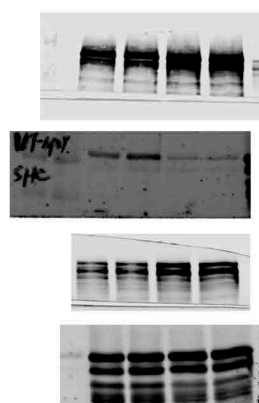

Supplement: JEM_20221563_SourceDataF2.pdf [file JEM_20221563_SourceDataF2.pdf]
