# Supplementary material for: Genome-wide CRISPR/Cas9 screens reveal shared and cell-specific mechanisms of resistance to SHP2 inhibition
Source: PubMed Central journal article supplement — J Exp Med. 2023 Feb 23;220(5):e20221563. doi: 10.1084/jem.20221563 (PMC9998968; doi:10.1084/jem.20221563), 2023-02-23

Cropped and Processed

Uncropped and Unprocessed

Cropped and Processed

Uncropped and Unprocessed

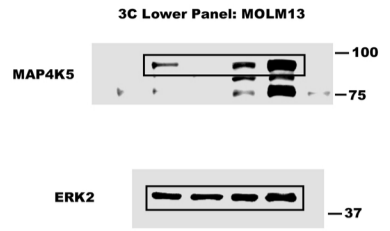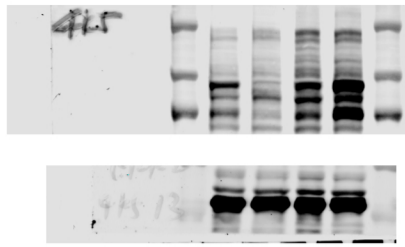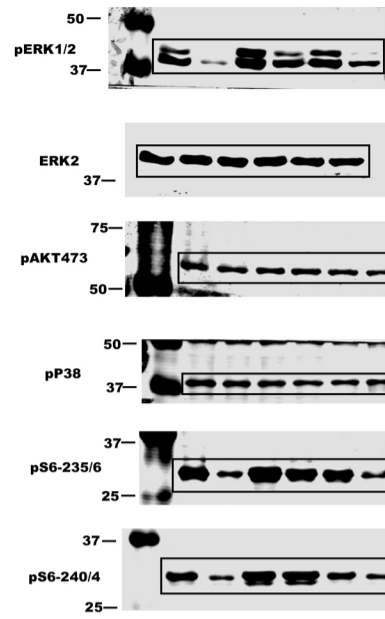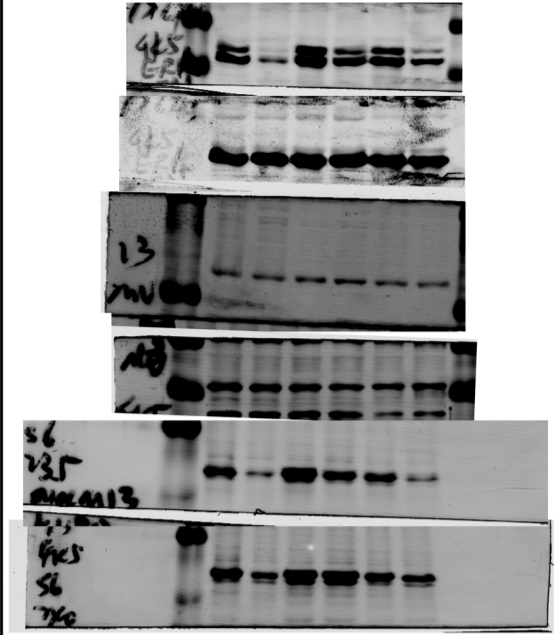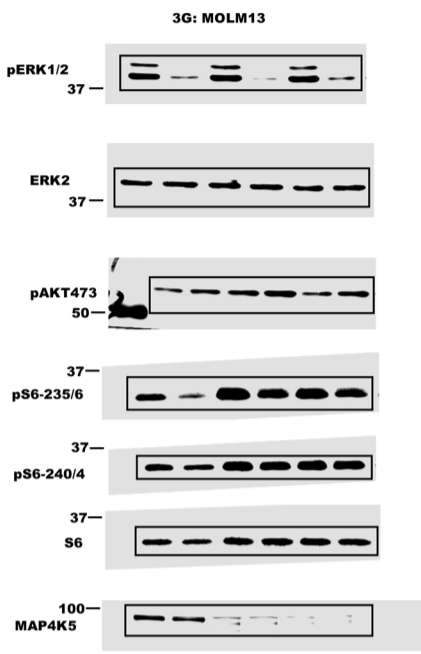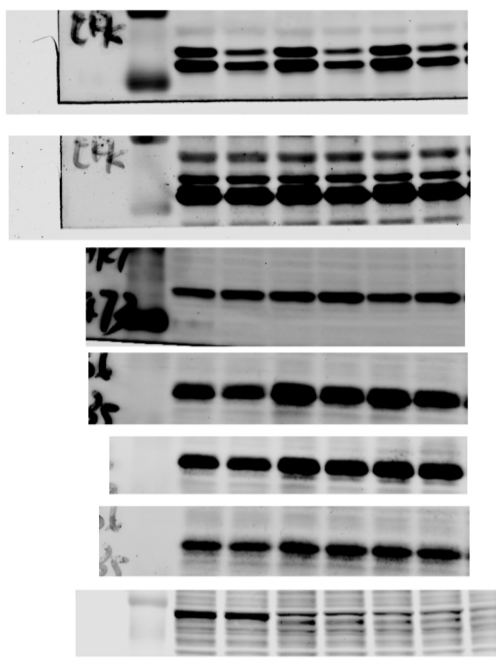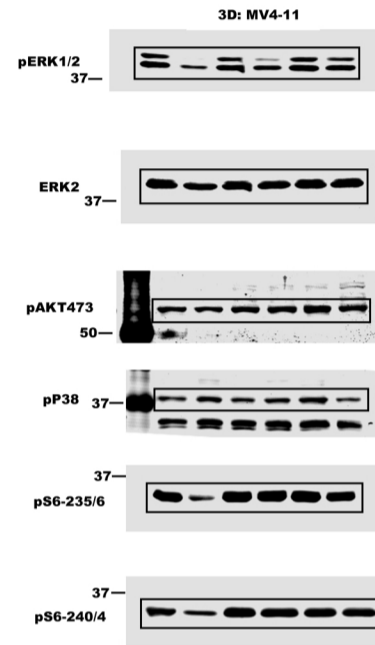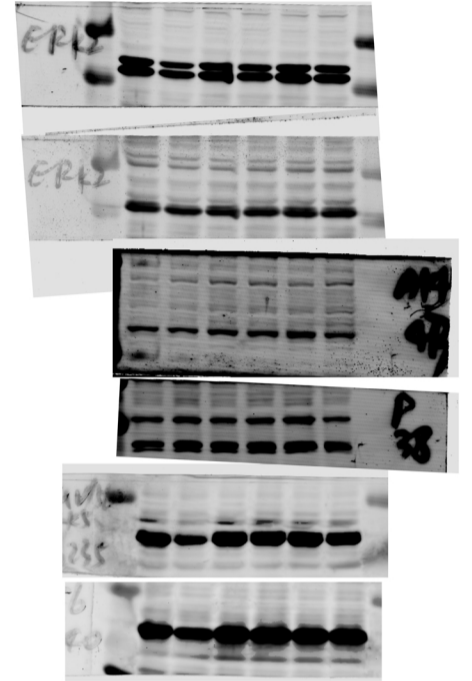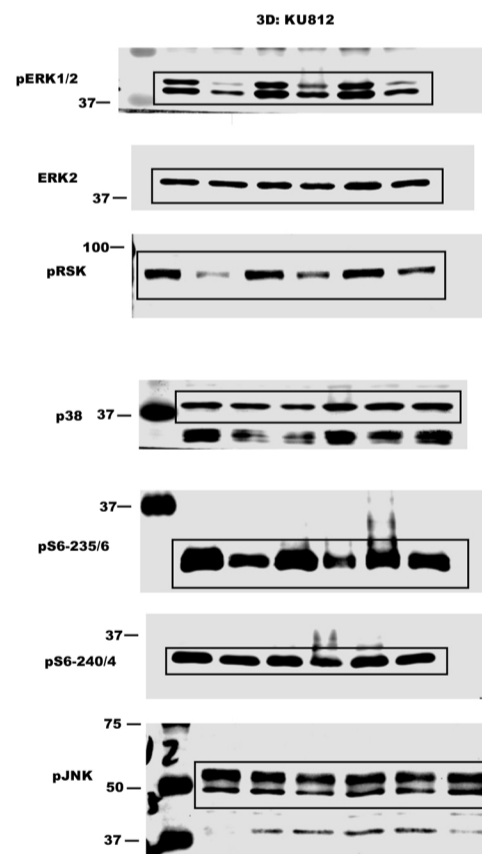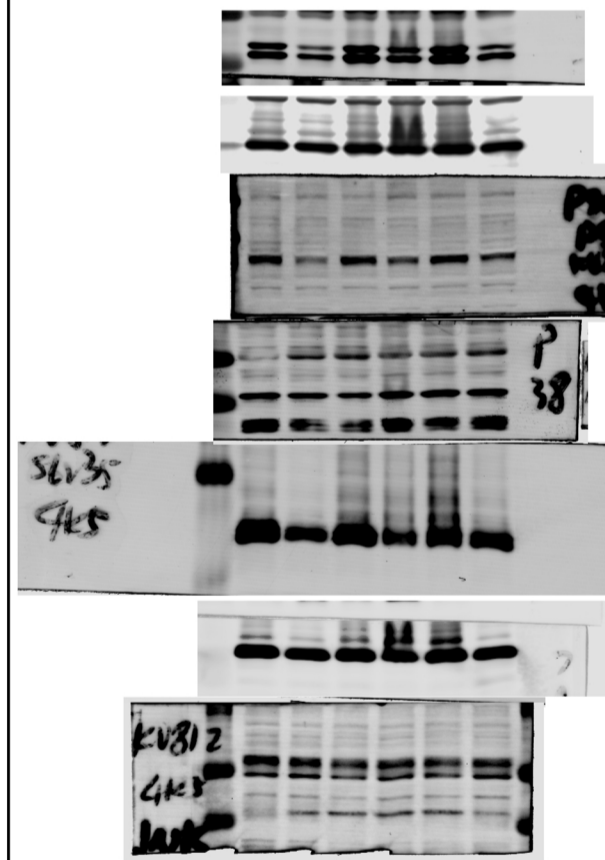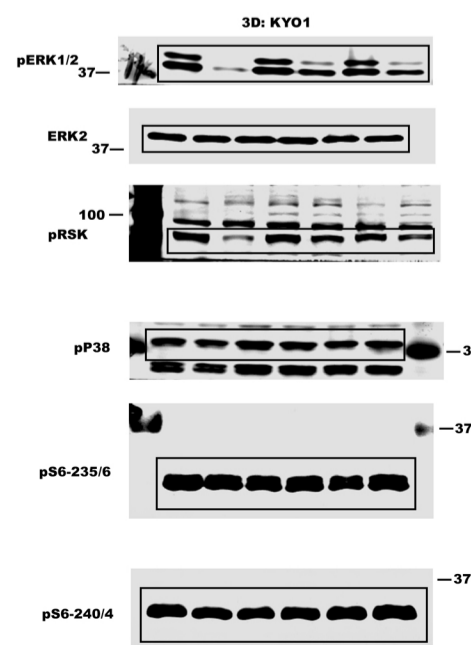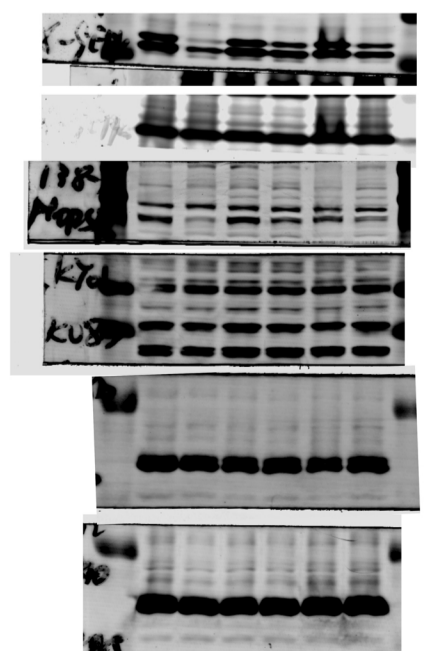

Supplement: JEM_20221563_SourceDataF3.pdf [file JEM_20221563_SourceDataF3.pdf]
