# Supplementary figures and images for: Genome-wide CRISPR/Cas9 screens reveal shared and cell-specific mechanisms of resistance to SHP2 inhibition
Source: PubMed Central journal article supplement — J Exp Med. 2023 Feb 23;220(5):e20221563. doi: 10.1084/jem.20221563 (PMC9998968; doi:10.1084/jem.20221563), 2023-02-23

Cropped and Processed

Uncropped and Unprocessed

4B: MOLM13

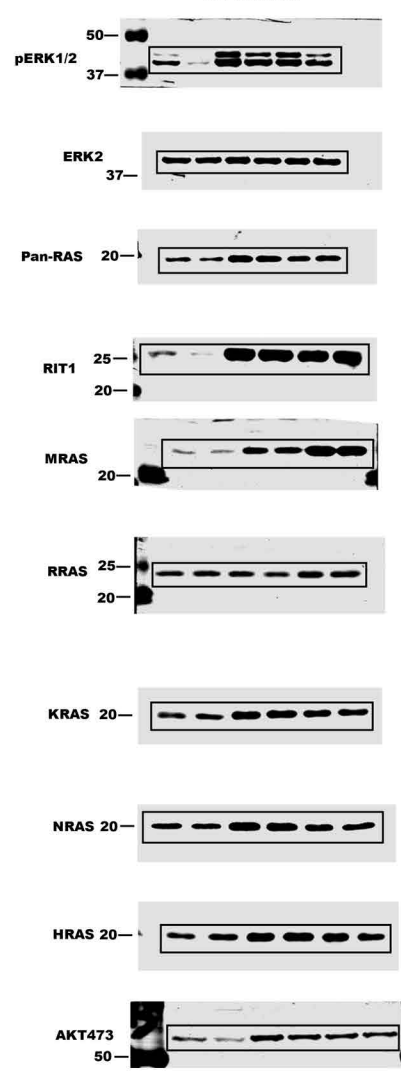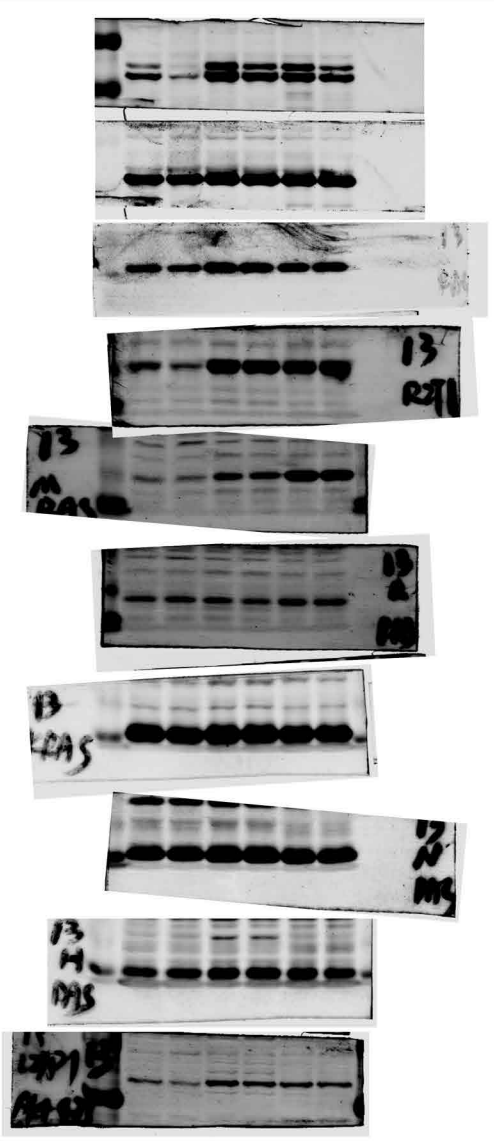

4B: MV4-11

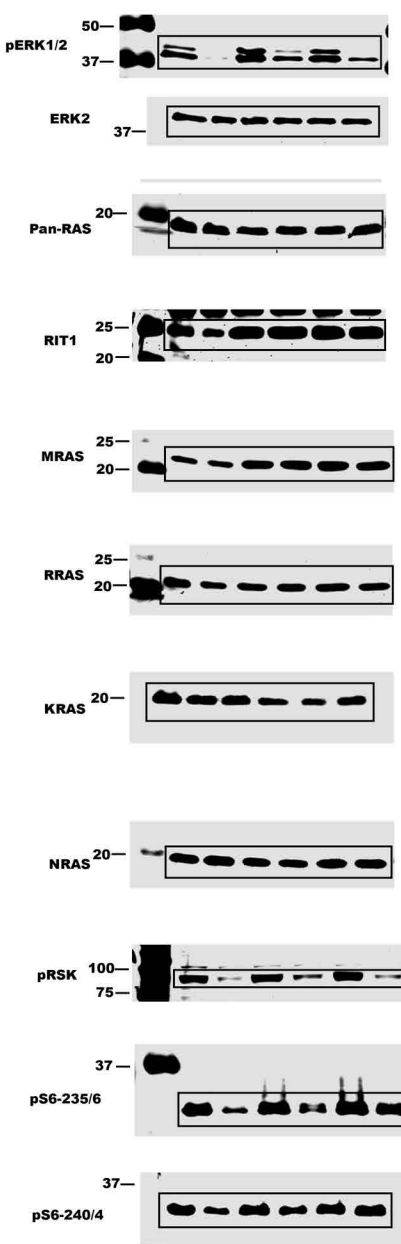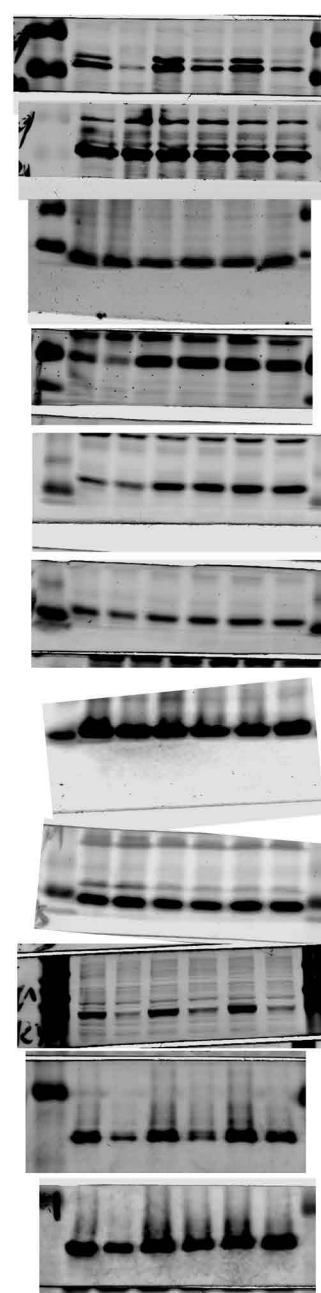

4B: K562

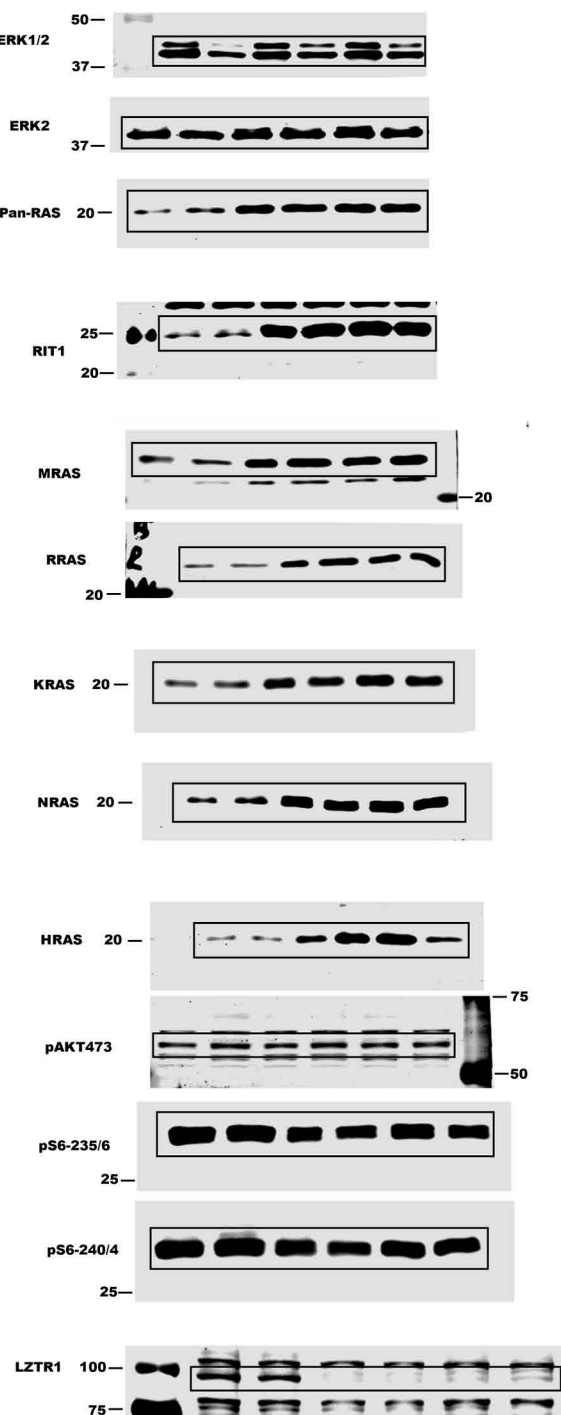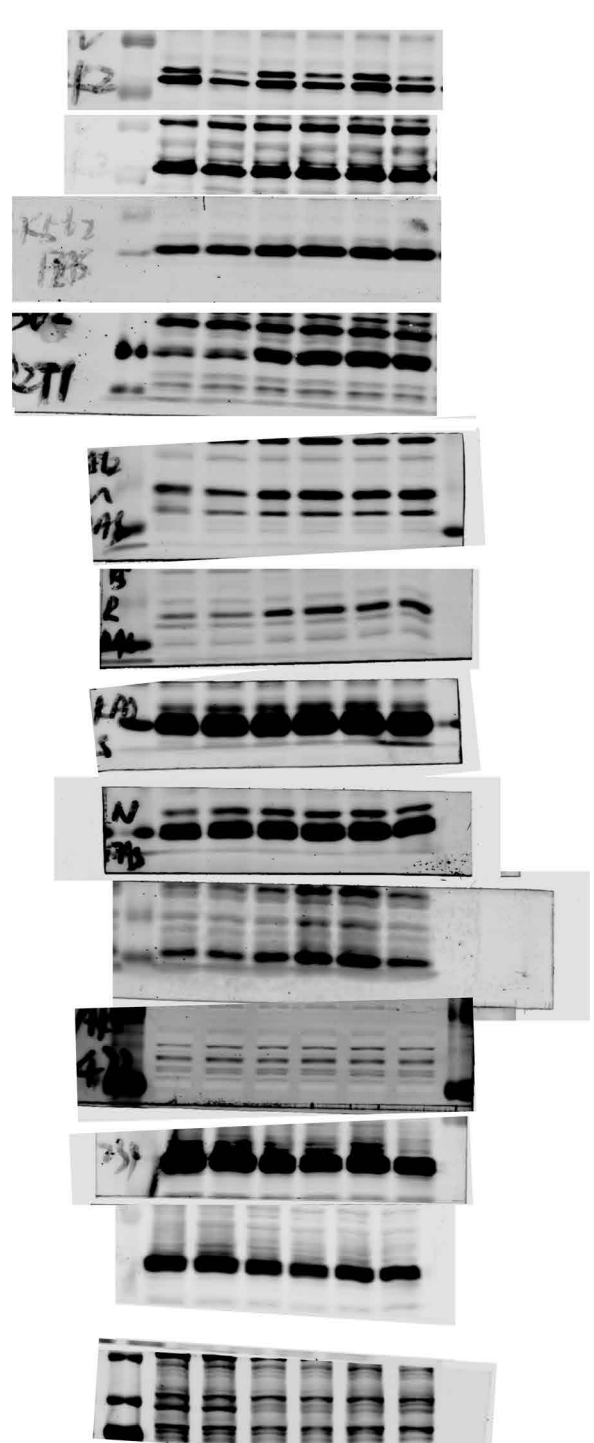

Supplement: JEM_20221563_SourceDataF4.pdf [file JEM_20221563_SourceDataF4.pdf]
